# Supplementary material
Source: Springer Nature journal article supplement (https://www.springermedizin.de/resource/supplementary/12963_2003_1_MOESM4_ESM.pdf/9572272)

- Burden not attributable to or avoidable with the risk factor of interest
- Burden attributable to prior exposure
- Burden avoidable with exposure reduction at  $T_0$

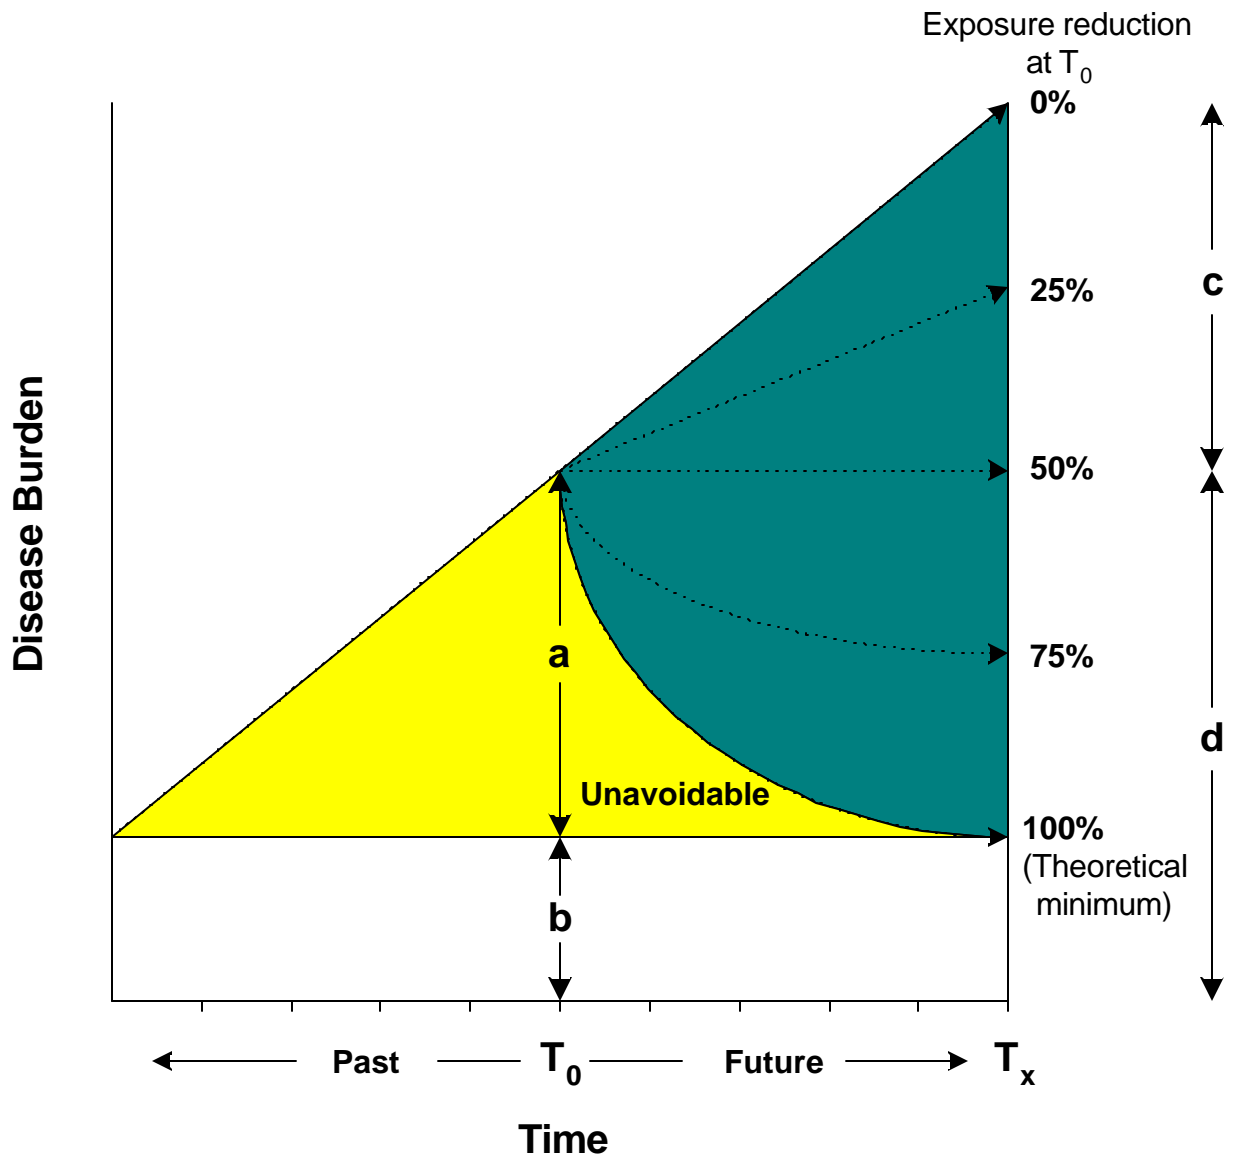

Supplement: MOESM4 [file 9572272]
